# Supplementary material for: The Role of Hemodynamics through the Circle of Willis in the Development of Intracranial Aneurysm: A Systematic Review of Numerical Models
Source: MDPI journal article supplement (doi:10.3390/jpm12061008), 2022-06-20
Supplement: s1 [file s1]

## **Supplementary S1: Search strategy**

### **Medline**

("Circle of Willis"[Mesh] OR willis\*[tiab] OR basilar circulation\*[tiab] OR ((cerebral[tiab] OR cerebri[tiab]) AND (circle[tiab] OR circulus[tiab]))) OR arterial circle [tiab] OR brain circulation[tiab] OR intracranial circulation[tiab] OR cerebral circulation[tiab] OR basilar circulation[tiab])

AND

("Intracranial Aneurysm"[Mesh] OR aneurysm\* [tiab])

AND

("Hemodynamics"[Mesh] OR hemodynamic\* [tiab] OR haemodynamic\*[tiab] OR Shear stress[tiab] OR Laminar flow[tiab] OR Turbulent flow[tiab] OR Computational fluid dynamic\*[tiab] OR CFD[tiab] OR Intra-aneurysmal flow[tiab] OR intraaneurysmal flow[tiab] OR flow velocity\*[tiab] OR flow rate\*[tiab])

NOT

("Animals"[Mesh] NOT "Humans"[Mesh])

### **Embase**

('brain circulus arteriosus'/exp OR (willis\* OR ((circle OR circulus OR circulation) NEAR/3 cerebr\*)) OR 'basilar circulation' OR 'arterial circle' OR 'brain circulation' OR 'intracranial circulation'):ab,ti)

AND

('intracranial aneurysm'/exp OR 'aneurysm\*':ab,ti)

AND

('hemodynamics'/exp OR (hemodynamic\* OR haemodynamic\* OR 'shear stress' OR 'laminar flow' OR 'turbulent flow' OR 'computational fluid dynamic\*' OR cfd OR 'intra-aneurysmal flow' OR 'intraaneurysmal flow' OR ' flow velocity' OR 'flow rate'):ab,ti)

NOT

('animal'/exp NOT 'human'/exp)

### **Web of Science**

TS= (willis\* OR (cerebr\* NEAR/3 (circle OR circulus OR circulation))) OR "basilar circulation" OR "arterial circle" OR "brain circulation" OR "intracranial circulation")

AND

TS= aneurysm\*

AND

TS= (hemodynamic\* OR haemodynamic\* OR "shear stress" OR "laminar flow" OR "turbulent flow" OR "computational fluid dynamic\*" OR cfd OR "intra-aneurysmal flow" OR "intraaneurysmal flow" OR "flow velocity" OR "flow rate")
