# Supplementary material for: The Role of Hemodynamics through the Circle of Willis in the Development of Intracranial Aneurysm: A Systematic Review of Numerical Models
Source: MDPI journal article supplement (doi:10.3390/jpm12061008), 2022-06-20
Supplement: s1 [file s1]

## **Supplementary S2: Studies excluded due to language**

1. Gonzalez-Llanos F, Pascual JM, Roda JM. Anatomic and hemodynamic, study of the anterior communicating artery complex. *Neurocirugia*. 2002;13(4):285-298.
2. Grigor'eva E V, Krylov V V. Assessment of cerebral hemodynamics using computed tomography perfusion in patients with intracranial aneurysms. *Vestn Rentgenol Radiol*. 2015;(2):5-14.
3. Todaro CA, Arena O, Fontana RA, et al. Transcranial doppler monitoring in cavernous sinus lesion. Pre and post operative evaluation of two cases. *Riv di Neurobiol*. 1997;43(2-3):137-140.
4. Qiu X, Fei Z, Wang W, Cao Z. Numerical analysis on hemodynamics of cerebral aneurysm clip. *J Biomed Eng*. 2012;29(1):102-106,111.
